# Supplementary material for: Synthesis, photophysical and electrochemical properties of pyridine, pyrazine and triazine-based (D–π–) 2 A fluorescent dyes
Source: publisher site journal article supplement (doi:10.3762/bjoc.15.167), 2019-07-22
Supplement: Additional file 1 [file 1860-5397-15-167-S1.pdf]

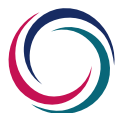

## Supporting Information

for

### Synthesis, photophysical and electrochemical properties of pyridine, pyrazine and triazine-based (D- $\pi$ -)A fluorescent dyes

Keiichi Imato, Toshiaki Enoki, Koji Uenaka and Yousuke Ooyama

*Beilstein J. Org. Chem.* **2019**, *15*, 1712–1721. [doi:10.3762/bjoc.15.167](https://doi.org/10.3762/bjoc.15.167)

### $^1\text{H}$ and $^{13}\text{C}$ NMR spectra of OUJ-2

(a)

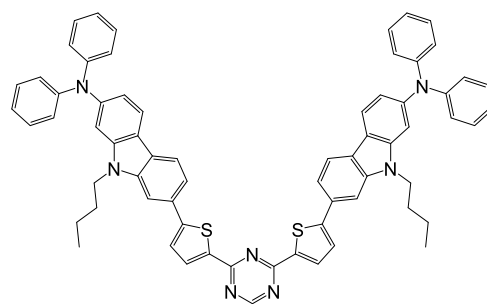

**OUJ-2**

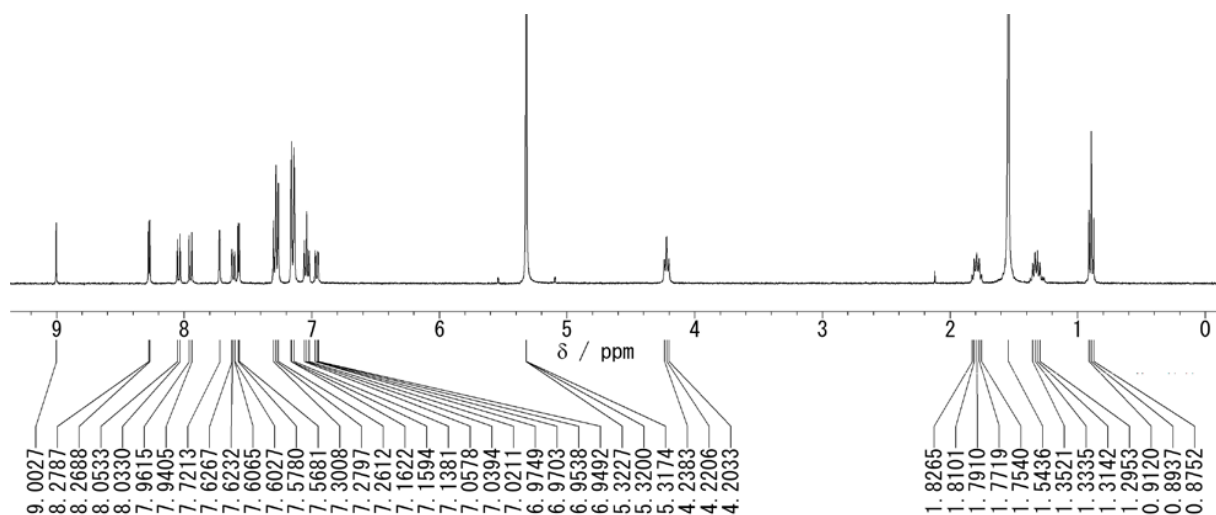

(b)

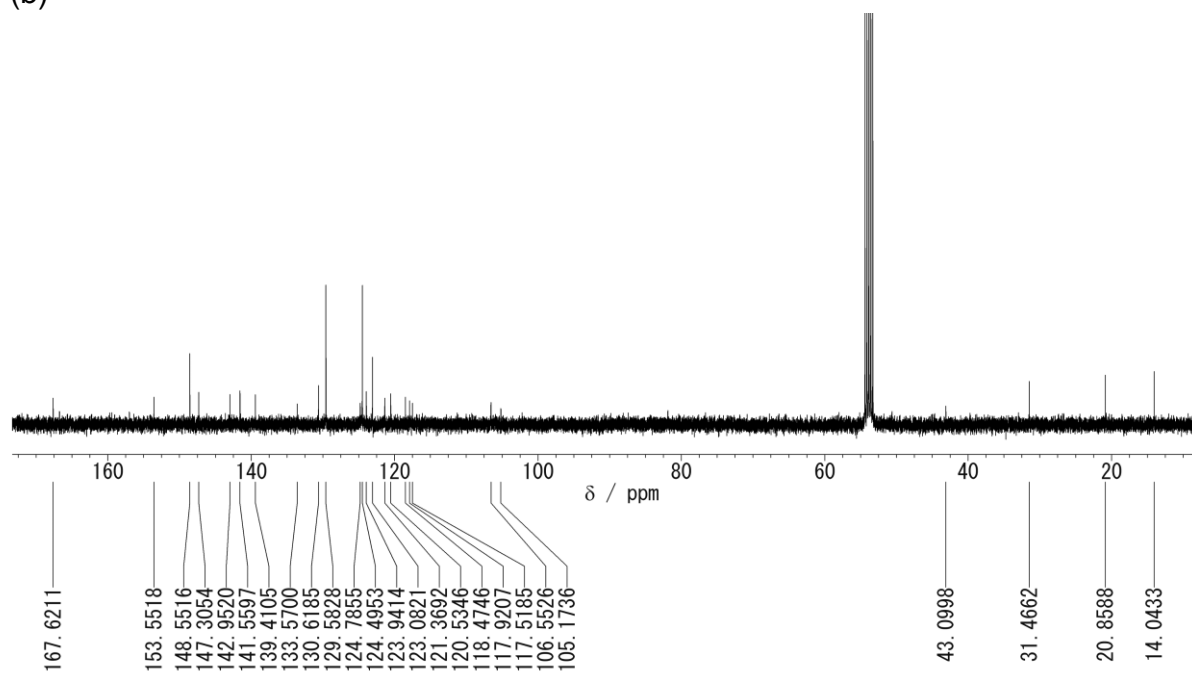

**Figure S1:** (a)  $^1\text{H}$  HMR (400 MHz) and (b)  $^{13}\text{C}$  HMR (100 MHz) spectra of **OUJ-2** in  $\text{CD}_2\text{Cl}_2$ .
